# Supplementary material for: Telopeptide-dependent xenogeneic collagen co-assembly
Source: Royal Society of Chemistry journal article supplement (doi:10.1039/c9nj01169b), 2019-01-01
Supplement: c9nj01169b1.pdf [file c9nj01169b1.pdf]

# Supporting Information

## **Telopeptide-dependent xenogeneic collagen co-assembly**

Benmei Wei<sup>†</sup>, Linjie Wang<sup>†</sup>, Huaying Zhong<sup>†</sup>, Juntao Zhang<sup>†</sup>, Chengzhi Xu<sup>†</sup>, Yuling Xu<sup>†</sup>, Lang He<sup>†</sup>, Sheng Li<sup>†</sup> and Haibo Wang<sup>\*†</sup>

<sup>†</sup>School of Chemical and Environmental Engineering, Wuhan Polytechnic University, Wuhan 430023, P. R. China

<sup>\*</sup>To whom correspondence should be addressed: [wanghaibo@whpu.edu.cn](mailto:wanghaibo@whpu.edu.cn).

## 1. SDS-PAGE analysis of collagens

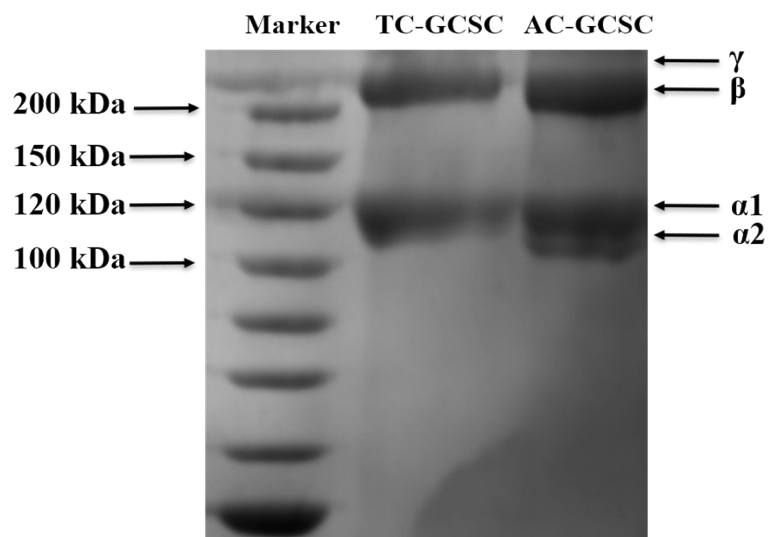

**Figure S1.** SDS-PAGE analysis of marker, TC-GCSC and AC-GCSC.

## 2. Fluorescence quenching of FITC-PSC by GO

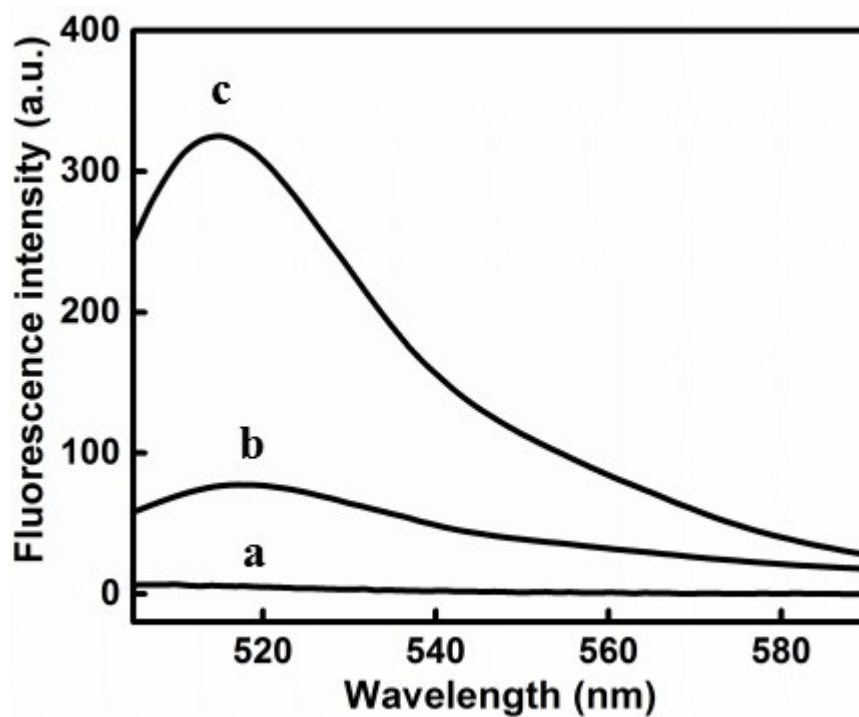

**Figure S2.** Fluorescence intensities of PSC (a), FITC-PSC (c), and the mixture of FITC-PSC and GO (b).

### 3. Comparison of the kinetics of XCCA in fluorescence assay

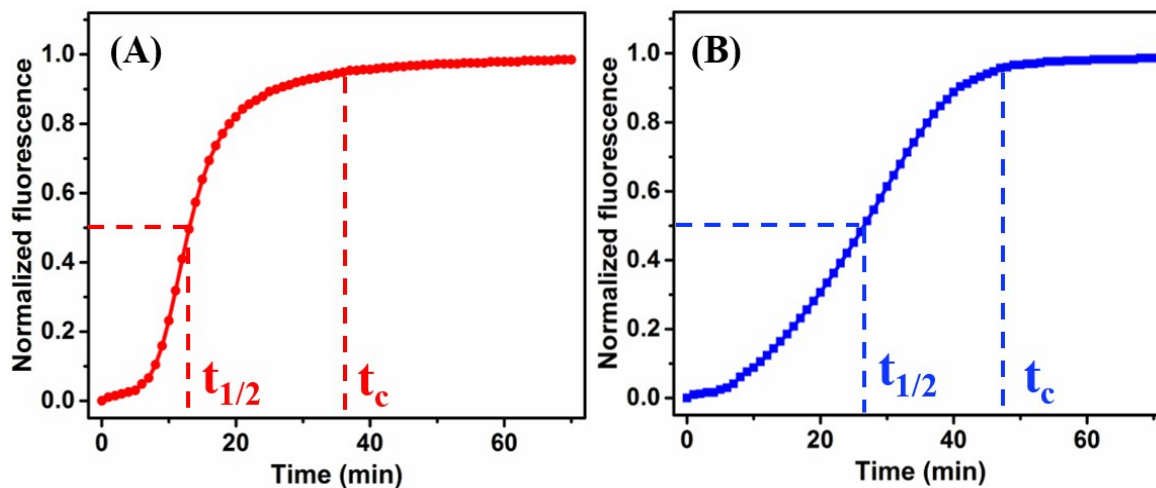

**Figure S3.** The kinetics of FITC-PSC/AC-GCSC co-assembly (A) and FITC-PS/TC-GCSC co-assembly (B) in fluorescence assay. Each experiment was performed at least three times and showed a representative example.

#### 4. Comparison of the kinetics of XCCA in turbidity assay

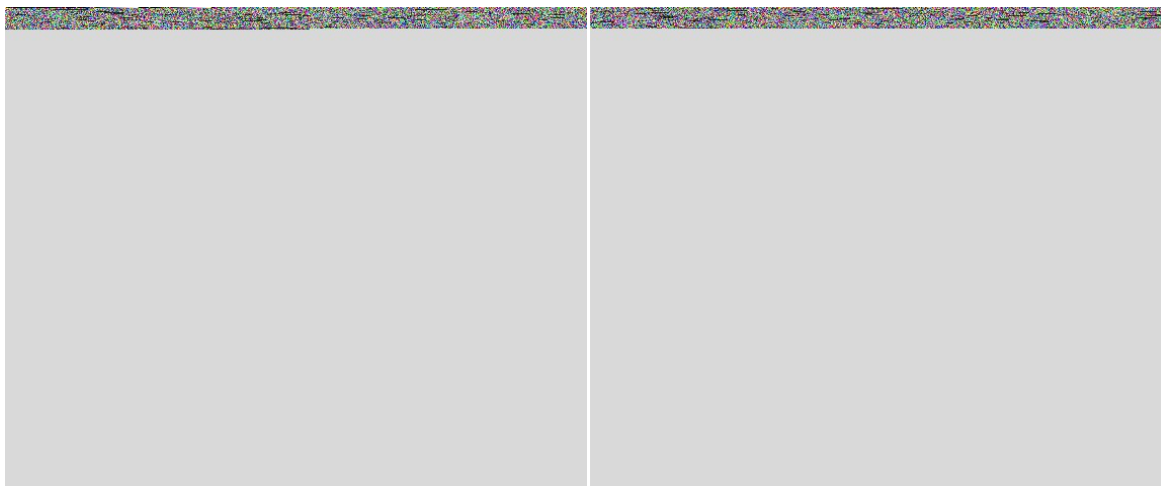

**Figure S4.** The kinetics of FITC-PSC/AC-GCSC co-assembly (A) and FITC-PSC/TC-GCSC co-assembly (B) in turbidity assay. Each experiment was performed at least three times and showed a representative example.

## 5. Rate constant ( $k$ ) calculation of XCCA

The rate constants of XCCA were calculated according to the following equation, where  $A_t$  is the absorbance at 310 nm at time  $t$ ,  $A_o$  and  $A_e$  are the absorbance at the beginning period ( $t=0$ ) and plateau phase respectively,  $k$  is rate constant.

$$-\ln \frac{A_e - A_t}{A_e - A_o} = kt$$

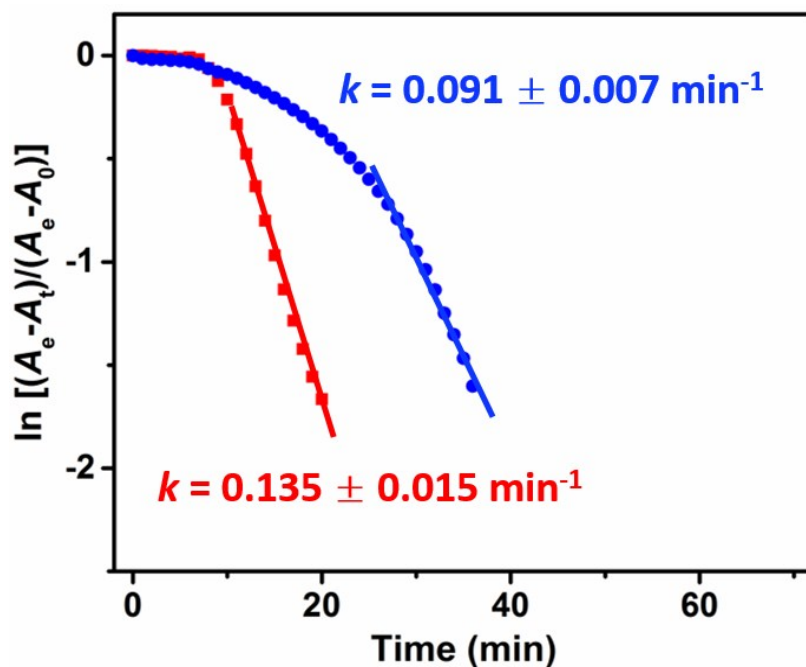

**Figure S5.** Rate constants ( $k$ ) of FITC-PSC and AC-GCSC co-assembly (red), and FITC-PSC and TC-GCSC co-assembly (blue).

## 6. SEM images of collagen fibrils

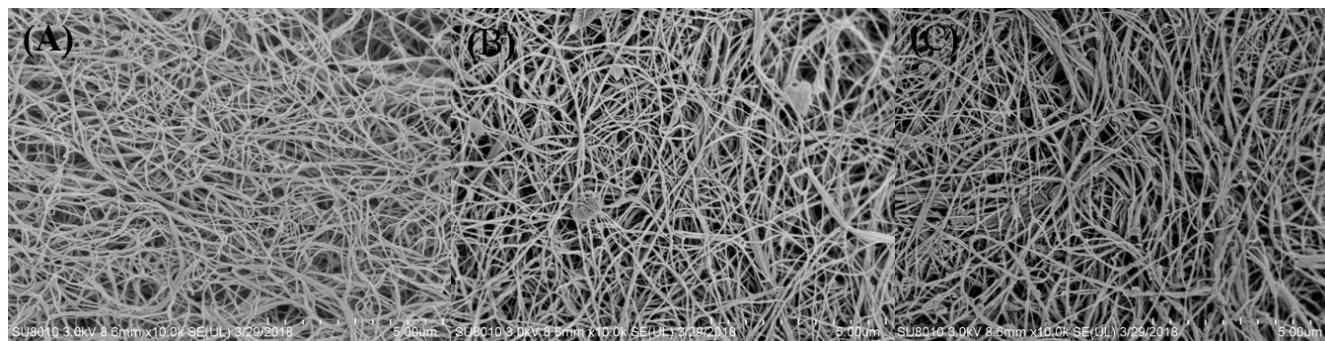

**Figure S6.** SEM images of PSC (A), AC-GCSC (B) and TC-GCSC (C) assembled fibrils.

## 7. Gelation dynamic of collagen self-assembly

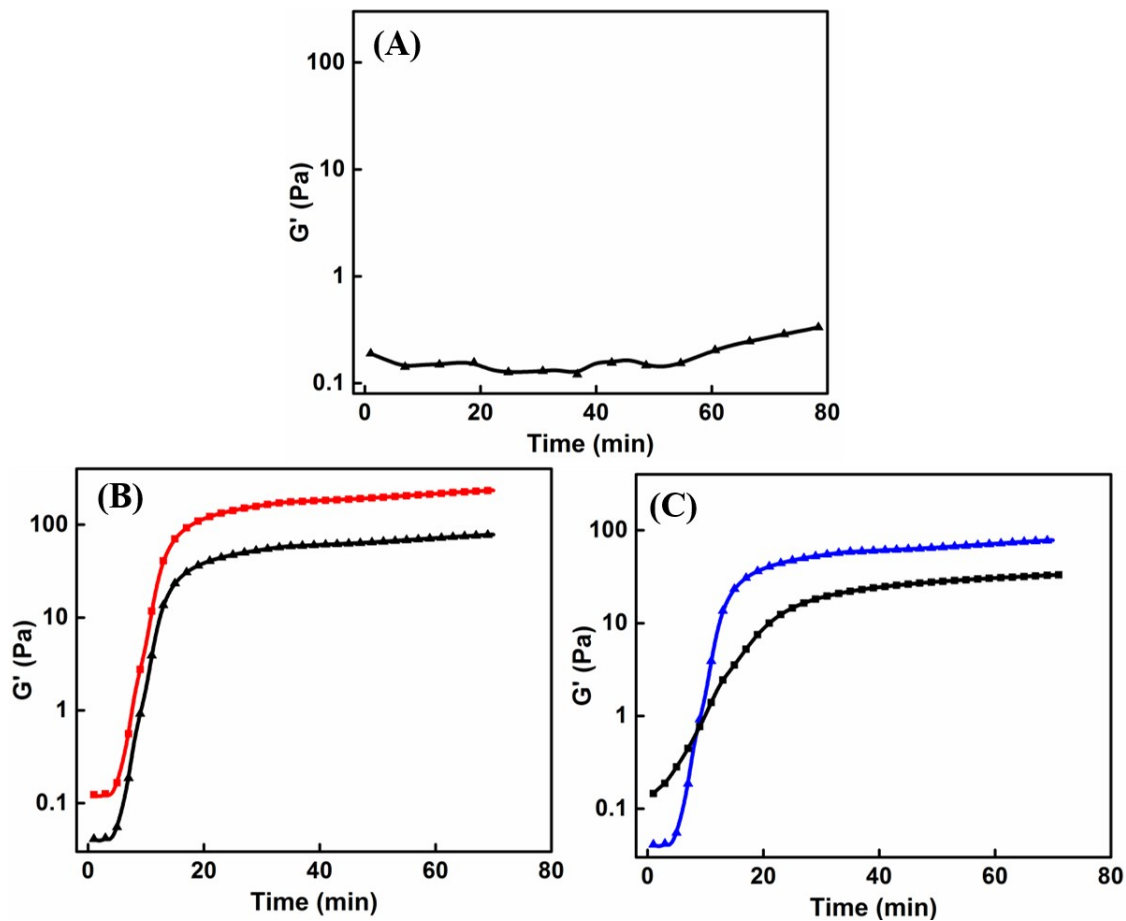

**Figure S7.** (A) Gelation dynamics of PSC sample at 30 °C; (B) Comparison of  $G'$  modulus between AC-GCSC (black line) and PSC/AC-GCSC (red line) samples; (C) Comparison of  $G'$  modulus between TC-GCSC (black line) and PSC/TC-GCSC (blue line) samples.
